# Supplementary material for: Integrative and distinctive coding of visual and conceptual object features in the ventral visual stream
Source: eLife. 2018 Feb 2;7:e31873. doi: 10.7554/eLife.31873 (PMC5832413; doi:10.7554/eLife.31873)
Supplement: Figure 6—source data 1. [file elife-31873-fig6-data1.xlsx]

## Sheet: Obtained Tau-a Values
	Lateral Occipital Cortex							Parahippocampal Cortex							Perirhinal Cortex							Temporal Pole
	Brain-Based Visual Task RDM			Brain-Based Conceptual Task RDM				Brain-Based Visual Task RDM			Brain-Based Conceptual Task RDM				Brain-Based Visual Task RDM			Brain-Based Conceptual Task RDM				Brain-Based Visual Task RDM			Brain-Based Conceptual Task RDM
Subject	Behaviour-Based Visual RDM	Behaviour-Based Conceptual RDM	word2vec RDM	Behaviour-Based Visual RDM	Behaviour-Based Conceptual RDM	word2vec RDM		Behaviour-Based Visual RDM	Behaviour-Based Conceptual RDM	word2vec RDM	Behaviour-Based Visual RDM	Behaviour-Based Conceptual RDM	word2vec RDM		Behaviour-Based Visual RDM	Behaviour-Based Conceptual RDM	word2vec RDM	Behaviour-Based Visual RDM	Behaviour-Based Conceptual RDM	word2vec RDM		Behaviour-Based Visual RDM	Behaviour-Based Conceptual RDM	word2vec RDM	Behaviour-Based Visual RDM	Behaviour-Based Conceptual RDM	word2vec RDM
1	0.085613	-0.051488	0.0385023	0.002137	0.00341	0.0256564		0.001024	-0.062568	0.0179409	0.015842	-0.062598	0.0699818		0.074562	0.021415	-0.00339996	0.05821	0.068295	0.0545904		0.00529	0.051572	-0.00544625	-0.052481	0.051554	0.000179701
2	0.048946	0.036723	-0.00879189	-0.020245	0.016226	0.0380422		0.012855	0.004894	0.0188675	0.01082	0.121382	0.0894191		0.066174	0.063578	0.00457678	-0.025686	0.052666	0.0495172		0.014833	0.018576	0.0268051	0.015814	0.025814	0.0218389
3	0.060348	-0.034113	0.0518536	-0.000346	0.041261	0.0292128		0.038352	0.109713	-0.00465061	0.008241	0.031389	0.103226		0.034018	0.014514	0.0634758	0.015829	0.002182	-0.0281938		0.002485	-0.001485	0.0674536	-0.035812	0.051	0.0299372
4	-0.023446	0.045266	0.0224832	0.028693	0.008209	-0.0341862		-0.040898	5.8e-05	0.0254136	0.000515	0.074715	-0.015696		0.061764	0.082751	0.0194434	0.061772	-2.4e-05	0.06611		-0.031952	0.009781	0.0302504	0.057158	0.0537284	0.0748241
5	0.067682	0.03314	0.078129	0.077112	0.033415	-0.0169474		0.028333	0.015982	0.0054596	-0.041589	-0.001381	0.0448903		-0.004517	0.055722	-0.0443444	0.051976	0.089183	0.0128158		-0.018529	0.033821	0.0489761	-0.05829	0.078711	0.0444557
6	0.041723	0.002018	-0.0184201	0.0091767	0.000422	-0.00641846		0.011628	-0.050547	-0.00508962	0.014001	0.0517452	0.0208373		0.051481	0.00839	0.0586749	0.00081	0.027591	0.0498112		0.028151	0.061572	-0.0132824	0.039987	0.001348	0.0107068
7	0.033564	-0.043152	0.0487832	0.005166	0.017168	-0.02392		0.020704	0.05472	-0.0220158	0.010145	0.071741	-4.48231e-05		0.062166	0.01582	0.0170962	0.035258	0.11182	0.0553016		0.024816	0.02029	0.0690901	0.031582	0.056666	0.0517057
8	-0.000452	-0.032448	-0.0184006	-0.018273	-0.016771	-0.0360896		-0.02814	-0.028401	0.025122	0.005289	0.064612	0.00420811		0.005689	0.047829	0.0169199	0.058776	0.091837	0.00601687		0.006281	0.051927	-0.0137495	0.031785	0.024381	-0.0317345
9	0.110252	0.008565	0.0752063	0.00827	0.003351	-0.00840989		-0.050391	0.025829	-0.00835322	0.020058	0.0934745	0.0840362		0.015728	0.091851	0.0041155	0.060215	0.063829	0.0195312		0.05015	0.066194	0.0574099	0.041766	0.068917	0.00435851
10	0.055343	-0.034455	0.0176438	0.009348	-0.037133	-0.0454451		0.005186	0.081794	0.0258488	0.000201	0.066284	0.101123		0.083245	0.000148	-0.00160367	0.02183	0.015827	-0.0192257		0.000422	0.048484	0.0478471	0.006813	0.031785	0.0473605
11	0.06945	0.072253	0.0616147	-0.010065	-0.028231	-0.0123019		0.057249	0.00894	0.0312183	-0.045691	0.038152	0.0831271		0.062852	-0.02482	0.0774277	0.094711	0.00636	0.0308701		-0.041581	0.001571	0.00821875	-0.015581	0.104278	0.0406564
12	0.051466	-0.040675	0.0433292	0.026033	0.005223	-0.0265909		-0.012538	-0.011648	0.0356564	-0.064719	-0.0072	0.00295986		0.0718594	0.052489	0.00929449	0.085721	0.051765	0.0756586		-0.024376	-0.032478	0.024839	-0.035891	-0.00384	0.0639697
13	0.061243	-0.013616	0.00820548	0.002177	-0.015463	-0.010268		0.000472	-0.021398	-0.01122	-0.032148	0.051486	-0.0196277		0.025672	0.018518	0.0564864	0.020028	0.0357	0.0617321		0.051852	0.081744	0.0633561	0.00042	0.056719	0.0422058
14	-0.073739	-0.044167	0.0450768	0.000541	0.060341	0.00363596		-0.015991	0.012489	-0.00522852	0.005829	0.092744	0.0838537		0.112855	0.076275	-0.00980198	-0.052256	0.081381	0.0236158		0.008526	0.035888	-0.0361367	0.004248	0.089472	0.0125081
15	0.084254	-0.050918	-0.0314913	-0.054222	-0.047715	-0.0212339		-0.006583	-0.0513519	0.00254962	0.012481	0.051748	0.0823139		0.017282	0.052111	0.0600298	0.065815	0.088872	0.0580472		0.015547	0.058177	0.0146744	0.025991	0.056672	0.046734
16	0.06223	0.050702	0.0263417	0.032525	0.00264	-0.0487357		0.052489	0.060248	0.0312817	-0.049148	-0.002471	0.0695118		0.092677	0.002519	0.0741272	0.00418	0.129052	0.0471319		-0.01751	0.059934	0.0405093	-0.048199	0.065197	0.00417929
