# Supplementary material for: Integrative and distinctive coding of visual and conceptual object features in the ventral visual stream
Source: eLife. 2018 Feb 2;7:e31873. doi: 10.7554/eLife.31873 (PMC5832413; doi:10.7554/eLife.31873)
Supplement: Figure 7—source data 1. [file elife-31873-fig7-data1.xlsx]

## Sheet: Obtained Tau-a Values
	Brain-Based RDM Similarity for Visual vs. Conceptual Task Context					Visual Task RDM Similarity Across ROIs							Conceptual Task RDM Similarity Across ROIs
Participant	LOC	PHC	PRC	TP		LOC-PHC	LOC-PRC	LOC-TP	PHC-PRC	PHC-TP	PRC-TP		LOC-PHC	LOC-PRC	LOC-TP	PHC-PRC	PHC-TP	PRC-TP
1	0.001231	0.001741	0.066553	-0.01302		0.007191	0.04487	-0.034582	0.014448	0.004582	0.017585		-0.006602	0.004574	0.002438	0.028224	0.004578	-0.01481
2	-0.017439	0.016584	0.02901	0.054561		0.025152	0.002384	-0.007591	0.002867	0.0401	-0.00034		0.000548	-0.047911	0.003811	-0.005715	0.017843	0.005884
3	-0.02137	-0.017581	0.088102	-0.01827		-0.035671	-0.057924	0.15821	0.003516	0.017484	0.05233		0.021884	0.000343	-0.00084	0.022849	0.047891	0.001348
4	0.000428	0.005122	-0.00189	0.024361		0.00918	0.033942	-0.059595	0.002348	-0.035891	0.00666		-0.047831	0.014057	-0.009571	-0.037144	-0.044825	0.01784
5	-0.025788	-0.007335	0.057292	0.03336		0.018443	-0.00106	0.028594	-0.047852	0.00728	0.003817		-0.028522	-0.041903	0.005481	0.00057	0.054881	-0.003315
6	-0.014893	0.025799	0.101311	0.081745		0.04285	0.039952	0.000852	0.0055	-0.027423	0.000765		-0.000581	0.058215	0.02248	-0.0004	0.007589	-0.008491
7	0.003844	0.024645	0.094478	0.069919		-0.014819	0.00405	0.01011	0.007816	0.021189	-0.055881		0.002289	0.02682	0.047831	0.058135	0.00098	0.027135
8	-0.037105	0.032128	0.017075	-0.010285		0.05522	-0.02184	0.004828	0.018491	0.0678121	0.024657		-0.038594	-0.004811	-0.00984	0.057883	0.008101	0.000528
9	-0.040719	-0.009473	0.024728	0.022189		-0.032759	0.075892	0.0081	9e-05	-0.04428	-0.04119		0.0158282	-0.058841	0.009841	0.0034745	-0.000138	0.000202
10	0.01471	0.051498	0.082749	-0.033312		0.027658	0.012782	0.01333	0.04822	0.006711	0.014233		-0.022491	0.058195	0.047818	0.000855	-0.01833	0.034811
11	0.008167	0.004331	0.074666	0.06981		0.04996	0.002443	-0.068199	-0.06821	0.00103	0.018678		0.01385	0.067102	0.007807	0.0067185	-0.0004	0.058135
12	-0.014441	-0.0201	0.066064	0.034811		0.000542	0.00891	-0.028352	0.05221	0.03855	0.008921		-0.062111	0.074821	0.004701	0.057581	0.005872	0.017899
13	-0.000581	0.047664	0.118591	-0.002819		0.01482	0.041947	-0.058111	0.080002	0.057819	0.010104		-0.035006	-0.03854	-0.008496	0.02319	-0.027849	0.000478
14	0.009674	-0.033031	0.098563	0.114513		-0.068984	-0.037458	-0.006811	-0.047183	0.00663	0.084786		-0.01015	0.000801	0.018501	0.048494	0.037814	0.0658
15	-0.017732	-0.00092	0.035811	0.048117		-0.006583	0.027812	0.000857	0.038522	-0.058901	0.062384		0.051582	0.007822	0.017818	4.5e-05	0.000501	0.000137
16	0.026114	0.010224	0.0502	-0.03113		0.045995	-0.015482	-0.074401	-0.00028	-0.000448	-0.04888		0.025478	-0.057285	-0.013789	-0.014378	0.057813	-0.024895
