# Supplementary material for: Integrative and distinctive coding of visual and conceptual object features in the ventral visual stream
Source: eLife. 2018 Feb 2;7:e31873. doi: 10.7554/eLife.31873 (PMC5832413; doi:10.7554/eLife.31873)
Supplement: Figure 8—source data 1. [file elife-31873-fig8-data1.xlsx]

## Sheet: Pearson's r
Subject	LOC	PHC	PRC	TP
1	0.0051731	-0.00239141	-0.0148968	0.0793595
2	0.009069	0.0133733	0.0529656	-0.0410177
3	0.00752945	0.0202574	0.0660365	0.0595588
4	-0.0112552	-0.0277061	0.0908066	0.0732415
5	0.000596295	0.015674	0.0573596	0.0447127
6	-0.0087482	-0.0391438	0.00654155	0.0772489
7	-0.0092665	-0.0164078	-0.0176124	0.0594095
8	0.0381716	-0.0287787	0.060713	0.0536486
9	0.0592591	0.0419318	0.0247645	0.0266073
10	-0.00700635	0.0261335	-0.0064674	0.0727937
11	0.0388338	-0.0355925	0.0660611	-0.0570993
12	0.017953	-0.00519843	0.0760867	0.0626272
13	0.00996285	-0.050653	0.0471266	-0.0551422
14	-0.0264496	0.0106007	0.0660005	0.0260965
15	-0.0118521	-0.0127644	0.0897093	0.0747496
16	0.00832989	-0.0359605	-0.00602811	-0.0113137
