# Supplementary material for: Integrative and distinctive coding of visual and conceptual object features in the ventral visual stream
Source: eLife journal article supplement (doi:10.7554/elife.31873), 2018-02-02
Supplement: supp [file elife_poa_e31873_Figure_1_source_data_1.xlsx]

## Sheet: Sheet1
Target	Conceptual Pair	Conceptual Similarity of Conceptual Pair	Visual Similarity of Conceptual Pair	Target	Visual Pair	Visual Similarity of Visual Pair	Conceptual Similarity of Visual Pair
antlers	horn	0.69	0.13	antlers	branch	0.62	0.04
battery	wire	0.22	0	battery	bullet	0.35	0
blackboard	chalk	0.67	0	blackboard	television	0.5	0
blanket	pillow	0.3	0	blanket	napkin	0.5	0
bowl	plate	0.53	0	bowl	cup	0.33	0.23
branch	leaf	0.58	0	branch	antlers	0.62	0.04
bullet	gun	0.43	0	bullet	battery	0.35	0
butterfly	caterpillar	0.58	0.03	butterfly	leaf	0.28	0
caterpillar	butterfly	0.58	0.03	caterpillar	comb	0.42	0
chalk	blackboard	0.67	0	chalk	cigarette	0.58	0
cigarette	coffee	0.23	0	cigarette	chalk	0.58	0
clock	watch	0.8	0.08	clock	plate	0.4	0
coffee	cup	0.67	0	coffee	ink	0.54	0.17
comb	hairdryer	0.41	0	comb	caterpillar	0.42	0
compass	map	0.27	0	compass	watch	0.71	0
cup	coffee	0.67	0	cup	bowl	0.33	0.23
cymbal	drumstick	0.51	0	cymbal	plate	0.73	0
drumstick	cymbal	0.51	0	drumstick	pen	0.25	0
fangs	snake	0.32	0	fangs	horn	0.36	0
gun	bullet	0.43	0	gun	hairdryer	0.58	0
hairdryer	comb	0.41	0	hairdryer	gun	0.58	0
horn	antlers	0.69	0.13	horn	fangs	0.36	0
ink	pen	0.62	0	ink	coffee	0.54	0.17
leaf	branch	0.58	0	leaf	butterfly	0.28	0
map	compass	0.27	0	map	napkin	0.53	0.06
marshmallow	sugar	0.69	0	marshmallow	pillow	0.64	0.27
napkin	sponge	0.41	0	napkin	map	0.53	0.06
pen	ink	0.62	0	pen	drumstick	0.25	0
pillow	blanket	0.3	0	pillow	marshmallow	0.64	0.27
plate	spoon	0.19	0	plate	cymbal	0.73	0
shovel	snow	0.42	0	shovel	spoon	0.7	0.08
snake	fangs	0.32	0	snake	wire	0.28	0
snow	shovel	0.42	0	snow	sugar	0.53	0
speaker	television	0.41	0	speaker	compass	0.14	0
sponge	napkin	0.41	0	sponge	pillow	0.11	0.04
spoon	plate	0.19	0	spoon	shovel	0.7	0.08
sugar	marshmallow	0.69	0	sugar	snow	0.53	0
television	speaker	0.41	0	television	blackboard	0.5	0
watch	clock	0.8	0.08	watch	compass	0.71	0
wire	battery	0.22	0	wire	snake	0.28	0
