# Supplementary material for: Integrative and distinctive coding of visual and conceptual object features in the ventral visual stream
Source: eLife journal article supplement (doi:10.7554/elife.31873), 2018-02-02
Supplement: supp [file elife_poa_e31873_Figure_1_source_data_2.xlsx]

## Sheet: behavior-based visual RDM
Behavior-Based Visual RDM
	antler	battery	blackboard	blanket	bowl	branch	bullet	butterfly	caterpillar	chalk	cigarette	clock	coffee	comb	compass	cup	cymbal	drumstick	fangs	gun	hairdryer	horn	ink	leaf	map	marshmallow	napkin	pen	pillow	plate	shovel	snake	snow	speaker	sponge	spoon	sugar	television	watch	wire
antler	0	1	1	1	1	0.38	1	1	1	1	1	1	1	1	1	1	1	1	1	1	1	0.87	1	1	1	1	1	1	1	1	1	0.96	1	1	1	1	1	1	1	0.86
battery	1	0	1	1	1	1	0.65	1	0.67	0.94	1	1	1	1	1	1	1	1	1	1	1	1	1	1	1	1	1	0.97	1	1	1	1	1	1	1	1	1	1	1	1
blackboard	1	1	0	1	1	1	1	1	1	1	1	1	1	1	1	1	1	1	1	1	1	1	1	1	0.92	1	1	1	1	0.92	1	1	1	1	1	1	1	0.5	1	1
blanket	1	1	1	0	1	1	1	1	1	1	1	1	1	1	1	1	1	1	1	1	1	1	1	1	0.84	1	0.5	1	1	1	1	1	0.86	1	1	1	1	1	1	1
bowl	1	1	1	1	0	1	1	1	1	1	1	0.96	1	1	1	0.67	0.87	1	1	1	1	1	1	1	1	1	1	1	1	1	1	1	1	0.84	1	1	1	1	1	1
branch	0.38	1	1	1	1	0	1	1	1	1	1	1	1	1	1	1	1	0.89	1	1	1	1	1	1	1	1	1	1	1	1	1	0.8	1	1	1	1	1	1	1	0.85
bullet	1	0.65	1	1	1	1	0	1	0.94	0.55	1	1	1	1	1	1	1	1	0.97	1	1	1	1	1	1	1	1	0.89	1	1	1	1	1	1	1	1	1	1	1	1
butterfly	1	1	1	1	1	1	1	0	0.97	1	1	1	1	1	1	1	1	1	1	1	1	1	0.97	0.72	1	1	0.89	1	1	1	1	1	1	1	1	1	1	1	1	1
caterpillar	1	0.67	1	1	1	1	0.94	0.97	0	0.97	0.96	1	1	0.58	1	1	1	1	1	1	1	1	1	1	1	1	1	0.86	1	1	1	0.3	1	1	1	1	1	1	1	1
chalk	1	0.94	1	1	1	1	0.55	1	0.97	0	0.42	1	1	1	1	1	1	0.94	1	1	1	1	1	1	1	0.96	1	0.73	1	1	1	0.92	0.89	1	1	1	1	1	1	1
cigarette	1	1	1	1	1	1	1	1	0.96	0.42	0	1	1	1	1	1	1	0.94	1	1	1	1	1	1	1	1	1	0.53	1	1	1	0.94	1	1	1	1	1	1	1	0.89
clock	1	1	1	1	0.96	1	1	1	1	1	1	0	1	1	0.32	1	0.61	1	1	1	1	1	1	1	1	1	1	1	1	0.6	1	1	1	0.8	1	1	1	1	0.92	1
coffee	1	1	1	1	1	1	1	1	1	1	1	1	0	1	1	1	1	1	1	1	1	1	0.46	1	1	1	1	1	1	1	1	1	1	1	1	1	1	1	1	1
comb	1	1	1	1	1	1	1	1	0.58	1	1	1	1	0	1	1	1	1	0.94	1	1	1	1	1	1	1	1	1	1	1	1	0.97	1	1	1	1	1	1	1	1
compass	1	1	1	1	1	1	1	1	1	1	1	0.32	1	1	0	1	0.8	1	1	1	1	1	1	1	1	1	1	1	1	0.75	1	1	1	0.86	1	1	1	1	0.29	1
cup	1	1	1	1	0.67	1	1	1	1	1	1	1	1	1	1	0	1	1	1	1	1	1	1	1	1	1	1	1	1	1	1	1	1	1	1	1	1	1	1	1
cymbal	1	1	1	1	0.87	1	1	1	1	1	1	0.61	1	1	0.8	1	0	1	1	1	1	1	1	1	1	1	1	1	1	0.27	1	1	1	1	1	1	1	1	1	1
drumstick	1	1	1	1	1	0.89	1	1	1	0.94	0.94	1	1	1	1	1	1	0	1	1	1	1	1	1	1	1	1	0.75	1	1	1	0.77	1	1	1	0.97	1	1	1	0.97
fangs	1	1	1	1	1	1	0.97	1	1	1	1	1	1	0.94	1	1	1	1	0	1	1	0.64	1	1	1	1	1	1	1	1	1	1	1	1	1	1	1	1	1	1
gun	1	1	1	1	1	1	1	1	1	1	1	1	1	1	1	1	1	1	1	0	0.42	1	1	1	1	1	1	1	1	1	1	1	1	1	1	1	1	1	1	1
hairdryer	1	1	1	1	1	1	1	1	1	1	1	1	1	1	1	1	1	1	1	0.42	0	1	1	1	1	1	1	1	1	1	1	1	1	1	1	1	1	1	1	1
horn	0.87	1	1	1	1	1	1	1	1	1	1	1	1	1	1	1	1	1	0.64	1	1	0	1	1	1	1	1	1	1	1	1	1	1	1	1	1	1	1	1	1
ink	1	1	1	1	1	1	1	0.97	1	1	1	1	0.46	1	1	1	1	1	1	1	1	1	0	1	1	1	1	1	1	1	1	1	1	1	0.96	1	1	1	1	1
leaf	1	1	1	1	1	1	1	0.72	1	1	1	1	1	1	1	1	1	1	1	1	1	1	1	0	1	1	0.86	1	1	1	1	1	1	1	1	1	1	1	1	1
map	1	1	0.92	0.84	1	1	1	1	1	1	1	1	1	1	1	1	1	1	1	1	1	1	1	1	0	1	0.47	1	1	1	1	1	1	1	1	1	1	1	1	1
marshmallow	1	1	1	1	1	1	1	1	1	0.96	1	1	1	1	1	1	1	1	1	1	1	1	1	1	1	0	0.94	1	0.36	0.89	1	1	1	1	0.89	1	1	1	1	1
napkin	1	1	1	0.5	1	1	1	0.89	1	1	1	1	1	1	1	1	1	1	1	1	1	1	1	0.86	0.47	0.94	0	1	1	1	1	1	0.93	1	1	1	1	1	1	1
pen	1	0.97	1	1	1	1	0.89	1	0.86	0.73	0.53	1	1	1	1	1	1	0.75	1	1	1	1	1	1	1	1	1	0	1	1	1	0.85	1	1	1	0.8	1	1	1	0.86
pillow	1	1	1	1	1	1	1	1	1	1	1	1	1	1	1	1	1	1	1	1	1	1	1	1	1	0.36	1	1	0	1	1	1	1	1	0.89	1	1	1	1	1
plate	1	1	0.92	1	1	1	1	1	1	1	1	0.6	1	1	0.75	1	0.27	1	1	1	1	1	1	1	1	0.89	1	1	1	0	1	1	1	0.79	1	1	1	1	0.96	1
shovel	1	1	1	1	1	1	1	1	1	1	1	1	1	1	1	1	1	1	1	1	1	1	1	1	1	1	1	1	1	1	0	1	1	1	1	0.3	1	1	1	1
snake	0.96	1	1	1	1	0.8	1	1	0.3	0.92	0.94	1	1	0.97	1	1	1	0.77	1	1	1	1	1	1	1	1	1	0.85	1	1	1	0	1	1	1	1	1	1	1	0.72
snow	1	1	1	0.86	1	1	1	1	1	0.89	1	1	1	1	1	1	1	1	1	1	1	1	1	1	1	1	0.93	1	1	1	1	1	0	1	1	1	0.47	1	1	1
speaker	1	1	1	1	0.84	1	1	1	1	1	1	0.8	1	1	0.86	1	1	1	1	1	1	1	1	1	1	1	1	1	1	0.79	1	1	1	0	1	1	1	1	1	1
sponge	1	1	1	1	1	1	1	1	1	1	1	1	1	1	1	1	1	1	1	1	1	1	0.96	1	1	0.89	1	1	0.92	1	1	1	1	1	0	1	1	1	1	1
spoon	1	1	1	1	1	1	1	1	1	1	1	1	1	1	1	1	1	0.97	1	1	1	1	1	1	1	1	1	0.8	1	1	0.3	1	1	1	1	0	1	1	1	1
sugar	1	1	1	1	1	1	1	1	1	1	1	1	1	1	1	1	1	1	1	1	1	1	1	1	1	1	1	1	1	1	1	1	0.47	1	1	1	0	1	1	1
television	1	1	0.5	1	1	1	1	1	1	1	1	1	1	1	1	1	1	1	1	1	1	1	1	1	1	1	1	1	1	1	1	1	1	1	1	1	1	0	1	1
watch	1	1	1	1	1	1	1	1	1	1	1	0.92	1	1	0.29	1	1	1	1	1	1	1	1	1	1	1	1	1	1	0.96	1	1	1	1	1	1	1	1	0	0.97
wire	0.86	1	1	1	1	0.85	1	1	1	1	0.89	1	1	1	1	1	1	0.97	1	1	1	1	1	1	1	1	1	0.86	1	1	1	0.72	1	1	1	1	1	1	0.97	0

## Sheet: behavior-based conceptual RDM
Behavior-Based Conceptual RDM
	antler	battery	blackboard	blanket	bowl	branch	bullet	butterfly	caterpillar	chalk	cigarette	clock	coffee	comb	compass	cup	cymbal	drumstick	fangs	gun	hairdryer	horn	ink	leaf	map	marshmallow	napkin	pen	pillow	plate	shovel	snake	snow	speaker	sponge	spoon	sugar	television	watch	wire
antler	0	1	1	1	1	0.96	0.92	1	1	1	1	1	1	1	1	1	1	0.92	1	1	1	0.31	1	1	1	1	1	1	1	1	1	1	1	1	1	1	1	1	1	1
battery	1	0	1	1	1	1	1	1	1	1	1	1	1	1	0.96	1	0.93	1	1	0.93	1	1	1	1	1	1	1	1	1	1	1	1	1	1	1	0.95	1	1	0.88	0.78
blackboard	1	1	0	1	1	1	1	1	1	0.33	1	1	1	1	1	1	1	1	1	1	1	1	0.77	1	1	1	1	0.73	1	1	1	1	1	1	1	1	1	1	1	1
blanket	1	1	1	0	1	1	1	1	1	1	1	0.92	0.95	1	1	1	1	1	1	1	0.94	1	1	1	1	0.93	1	1	0.7	1	1	1	1	1	0.89	1	1	1	1	1
bowl	1	1	1	1	0	1	1	1	1	1	1	1	1	1	1	0.77	1	1	1	1	1	1	1	1	1	1	1	1	1	0.47	1	1	1	1	1	0.44	0.86	1	1	1
branch	0.96	1	1	1	1	0	1	1	0.93	1	1	1	1	1	1	1	1	0.9	1	1	1	1	1	0.42	1	1	1	1	1	1	0.95	1	1	1	1	0.95	1	1	1	1
bullet	0.92	1	1	1	1	1	0	1	1	1	1	1	1	1	1	1	0.85	1	1	0.57	1	0.93	1	1	1	1	1	1	1	1	0.95	1	1	0.95	1	0.95	1	1	1	0.97
butterfly	1	1	1	1	1	1	1	0	0.42	1	1	1	1	1	1	1	1	1	1	1	1	1	1	1	1	1	1	1	1	1	1	1	1	1	1	1	1	1	1	1
caterpillar	1	1	1	1	1	0.93	1	0.42	0	1	1	1	1	1	1	1	1	1	1	1	1	1	1	0.87	1	1	1	1	1	1	1	1	1	1	1	1	1	1	1	1
chalk	1	1	0.33	1	1	1	1	1	1	0	1	1	1	1	1	1	1	1	1	1	1	1	0.85	1	1	1	1	0.47	1	1	1	1	1	1	1	1	1	1	1	1
cigarette	1	1	1	1	1	1	1	1	1	1	0	1	0.77	1	1	1	1	1	1	1	1	1	1	1	0.97	1	0.89	1	1	1	1	1	1	1	1	1	1	1	1	1
clock	1	1	1	0.92	1	1	1	1	1	1	1	0	1	1	1	1	1	1	1	1	1	1	1	1	1	1	1	1	0.92	1	1	1	1	1	1	1	1	1	0.2	1
coffee	1	1	1	0.95	1	1	1	1	1	1	0.77	1	0	1	1	0.33	1	1	1	1	1	1	0.83	1	1	1	0.86	1	1	1	1	1	1	1	1	0.86	0.54	1	1	1
comb	1	1	1	1	1	1	1	1	1	1	1	1	1	0	1	1	1	1	1	1	0.59	1	1	1	1	1	1	1	1	1	1	1	1	1	1	1	1	1	1	1
compass	1	0.96	1	1	1	1	1	1	1	1	1	1	1	1	0	1	1	1	1	0.93	1	1	1	1	0.73	1	1	1	1	1	1	1	1	1	1	0.97	1	1	1	1
cup	1	1	1	1	0.77	1	1	1	1	1	1	1	0.33	1	1	0	1	1	1	1	1	1	1	1	1	1	1	1	1	0.68	1	1	1	1	1	0.69	1	1	1	1
cymbal	1	0.93	1	1	1	1	0.85	1	1	1	1	1	1	1	1	1	0	0.49	1	0.83	0.9	1	1	1	1	1	1	1	1	1	0.92	1	1	0.73	1	0.92	1	1	1	0.92
drumstick	0.92	1	1	1	1	0.9	1	1	1	1	1	1	1	1	1	1	0.49	0	1	1	1	1	1	1	1	1	1	1	1	1	0.92	1	1	0.92	1	1	1	1	1	1
fangs	1	1	1	1	1	1	1	1	1	1	1	1	1	1	1	1	1	1	0	0.9	1	1	1	1	1	1	1	1	1	1	1	0.68	1	1	1	1	1	1	1	1
gun	1	0.93	1	1	1	1	0.57	1	1	1	1	1	1	1	0.93	1	0.83	1	0.9	0	1	0.97	1	1	1	1	1	1	1	1	0.97	1	1	0.94	1	0.97	1	1	1	0.94
hairdryer	1	1	1	0.94	1	1	1	1	1	1	1	1	1	0.59	1	1	0.9	1	1	1	0	1	1	1	1	1	1	0.96	1	1	1	1	1	0.94	1	1	1	1	1	0.9
horn	0.31	1	1	1	1	1	0.93	1	1	1	1	1	1	1	1	1	1	1	1	0.97	1	0	1	1	1	1	1	1	1	1	1	1	1	1	1	1	1	1	1	1
ink	1	1	0.77	1	1	1	1	1	1	0.85	1	1	0.83	1	1	1	1	1	1	1	1	1	0	1	1	1	1	0.38	1	1	1	1	1	1	1	1	1	1	1	1
leaf	1	1	1	1	1	0.42	1	1	0.87	1	1	1	1	1	1	1	1	1	1	1	1	1	1	0	1	1	1	1	1	1	1	1	1	1	1	1	1	1	1	1
map	1	1	1	1	1	1	1	1	1	1	0.97	1	1	1	0.73	1	1	1	1	1	1	1	1	1	0	1	0.94	1	1	1	1	1	1	1	1	1	1	1	1	1
marshmallow	1	1	1	0.93	1	1	1	1	1	1	1	1	1	1	1	1	1	1	1	1	1	1	1	1	1	0	0.97	1	0.73	1	1	1	0.96	1	0.88	1	0.31	1	1	1
napkin	1	1	1	1	1	1	1	1	1	1	0.89	1	0.86	1	1	1	1	1	1	1	1	1	1	1	0.94	0.97	0	1	1	0.93	1	1	1	1	0.59	1	1	1	1	1
pen	1	1	0.73	1	1	1	1	1	1	0.47	1	1	1	1	1	1	1	1	1	1	0.96	1	0.38	1	1	1	1	0	1	1	1	1	1	1	1	1	1	1	1	1
pillow	1	1	1	0.7	1	1	1	1	1	1	1	0.92	1	1	1	1	1	1	1	1	1	1	1	1	1	0.73	1	1	0	1	1	1	0.97	1	0.96	1	1	1	1	1
plate	1	1	1	1	0.47	1	1	1	1	1	1	1	1	1	1	0.68	1	1	1	1	1	1	1	1	1	1	0.93	1	1	0	1	1	1	1	1	0.81	1	1	1	1
shovel	1	1	1	1	1	0.95	0.95	1	1	1	1	1	1	1	1	1	0.92	0.92	1	0.97	1	1	1	1	1	1	1	1	1	1	0	1	0.58	1	1	0.92	1	1	1	0.85
snake	1	1	1	1	1	1	1	1	1	1	1	1	1	1	1	1	1	1	0.68	1	1	1	1	1	1	1	1	1	1	1	1	0	1	1	1	1	1	1	1	1
snow	1	1	1	1	1	1	1	1	1	1	1	1	1	1	1	1	1	1	1	1	1	1	1	1	1	0.96	1	1	0.97	1	0.58	1	0	1	0.96	1	1	1	1	1
speaker	1	1	1	1	1	1	0.95	1	1	1	1	1	1	1	1	1	0.73	0.92	1	0.94	0.94	1	1	1	1	1	1	1	1	1	1	1	1	0	1	1	1	0.59	1	0.82
sponge	1	1	1	0.89	1	1	1	1	1	1	1	1	1	1	1	1	1	1	1	1	1	1	1	1	1	0.88	0.59	1	0.96	1	1	1	0.96	1	0	0.96	1	1	1	1
spoon	1	0.95	1	1	0.44	0.95	0.95	1	1	1	1	1	0.86	1	0.97	0.69	0.92	1	1	0.97	1	1	1	1	1	1	1	1	1	0.81	0.92	1	1	1	0.96	0	0.93	1	1	0.93
sugar	1	1	1	1	0.86	1	1	1	1	1	1	1	0.54	1	1	1	1	1	1	1	1	1	1	1	1	0.31	1	1	1	1	1	1	1	1	1	0.93	0	1	1	1
television	1	1	1	1	1	1	1	1	1	1	1	1	1	1	1	1	1	1	1	1	1	1	1	1	1	1	1	1	1	1	1	1	1	0.59	1	1	1	0	1	0.85
watch	1	0.88	1	1	1	1	1	1	1	1	1	0.2	1	1	1	1	1	1	1	1	1	1	1	1	1	1	1	1	1	1	1	1	1	1	1	1	1	1	0	1
wire	1	0.78	1	1	1	1	0.97	1	1	1	1	1	1	1	1	1	0.92	1	1	0.94	0.9	1	1	1	1	1	1	1	1	1	0.85	1	1	0.82	1	0.93	1	0.85	1	0

## Sheet: word2vec RDM
word2vec RDM (cosine dissimilarity derived from Word2Vec)
	antler	battery	blackboard	blanket	bowl	branch	bullet	butterfly	caterpillar	chalk	cigarette	clock	coffee	comb	compass	cup	cymbal	drumstick	fangs	gun	hairdryer	horn	ink	leaf	map	marshmallow	napkin	pen	pillow	plate	shovel	snake	snow	speaker	sponge	spoon	sugar	television	watch	wire
antler	0	0.979057	0.870918	0.830671	0.91686	0.925174	0.859338	0.785984	0.756016	0.937469	0.849926	0.879739	0.899641	0.862896	0.78617	0.87011	0.698554	0.746846	0.688956	0.781387	0.955291	0.731562	0.942055	0.749879	0.944681	0.775527	0.855533	0.868015	0.800691	0.8194	0.841251	0.762239	0.753665	0.972662	0.855971	0.78602	0.920355	1.01191	1.01822	0.842787
battery	0.979057	0	0.983164	0.919965	0.931182	0.994703	0.944417	0.966659	0.90769	1.05312	0.89496	0.732095	0.970799	1.01235	0.795861	0.874389	0.916976	0.916376	0.935779	0.842089	0.771465	0.923933	0.862927	0.960407	0.968705	0.937291	0.914658	0.841357	0.778775	0.945937	0.877091	0.933724	0.974133	0.893684	0.875131	0.876792	0.889621	0.916833	0.923182	0.862356
blackboard	0.870918	0.983164	0	0.894872	0.826594	1.00832	0.826206	0.908115	0.83712	0.562532	0.939836	0.844058	0.850409	0.807473	0.766651	0.896795	0.786055	0.752164	0.864687	0.924876	0.769659	0.776887	0.708776	0.858029	0.733476	0.782602	0.599776	0.677487	0.777115	0.792227	0.837637	0.869244	0.893134	0.846166	0.810833	0.755155	0.90918	0.824108	0.870904	0.91184
blanket	0.830671	0.919965	0.894872	0	0.904376	0.945149	0.887728	0.86697	0.866299	0.885633	0.822833	0.908999	0.899844	0.787381	0.936801	0.836124	0.940235	0.861825	0.905835	0.822602	0.78984	0.909521	0.824818	0.81974	0.860724	0.749389	0.669264	0.824057	0.506005	0.867019	0.753499	0.803951	0.711938	1.07009	0.785413	0.790206	0.947396	0.893536	0.875279	0.787148
bowl	0.91686	0.931182	0.826594	0.904376	0	1.06456	0.927153	0.860295	0.891261	0.795067	0.956164	0.896719	0.903618	0.84069	0.983366	0.597327	0.88643	0.761975	0.936824	0.96104	0.919314	0.918184	0.898577	0.857023	0.972572	0.717929	0.781228	0.948142	0.84828	0.757729	0.802922	0.824876	0.882684	1.00686	0.766856	0.626768	0.805829	0.90562	0.872861	0.90895
branch	0.925174	0.994703	1.00832	0.945149	1.06456	0	0.920297	0.933703	0.936602	0.99499	0.985917	0.974469	0.923828	0.947544	0.982432	0.949049	0.907928	0.883962	0.846101	0.948799	0.988222	1.02126	1.00584	0.817309	0.948574	1.00758	0.99033	0.977763	0.973283	0.982515	0.984419	0.915508	0.960738	0.900028	0.92819	1.03053	1.00466	0.98255	0.969458	0.898024
bullet	0.859338	0.944417	0.826206	0.887728	0.927153	0.920297	0	0.856521	0.813784	0.962463	0.861406	0.94768	0.936449	0.789652	0.847684	0.891251	0.846293	0.733367	0.754911	0.527194	0.854983	0.839401	0.879626	0.890694	0.898635	0.825281	0.825222	0.844943	0.801569	0.833789	0.805198	0.682187	0.973291	0.912063	0.902155	0.827227	0.995294	0.97416	0.970545	0.842001
butterfly	0.785984	0.966659	0.908115	0.86697	0.860295	0.933703	0.856521	0	0.567035	0.869718	0.942805	0.873881	0.908495	0.877655	0.854064	0.900131	0.933524	0.810364	0.820881	0.864106	0.955846	0.933356	0.852427	0.672882	0.895352	0.76685	0.8979	0.847349	0.854748	0.915674	0.92487	0.646114	1.0038	0.955922	0.782596	0.833033	0.984983	0.99506	0.926083	0.905672
caterpillar	0.756016	0.90769	0.83712	0.866299	0.891261	0.936602	0.813784	0.567035	0	0.892447	0.875017	0.924475	0.865373	0.836854	0.868368	0.915433	0.881331	0.744395	0.68299	0.926648	0.90443	0.847806	0.956721	0.567402	0.878534	0.622967	0.838945	0.942499	0.821419	0.871624	0.813783	0.542123	0.790047	0.982464	0.694589	0.729021	0.873057	0.985172	0.939863	0.930091
chalk	0.937469	1.05312	0.562532	0.885633	0.795067	0.99499	0.962463	0.869718	0.892447	0	0.915282	0.906049	0.86988	0.784535	0.812214	0.867639	0.92434	0.875407	0.96271	0.971998	0.917099	0.970407	0.703866	0.752769	0.702711	0.7893	0.729023	0.754553	0.870451	0.862694	0.806323	0.880999	0.845187	1.03738	0.795204	0.789339	0.853474	0.9825	0.917252	0.937694
cigarette	0.849926	0.89496	0.939836	0.822833	0.956164	0.985917	0.861406	0.942805	0.875017	0.915282	0	0.988288	0.632905	0.851316	0.928412	0.827125	0.835471	0.809978	0.931526	0.706836	0.806581	0.925476	0.839567	0.746014	0.908378	0.792322	0.804538	0.855048	0.78164	0.928788	0.919772	0.861547	0.924751	0.88451	0.919715	0.847182	0.727086	0.789902	0.973087	0.944322
clock	0.879739	0.732095	0.844058	0.908999	0.896719	0.974469	0.94768	0.873881	0.924475	0.906049	0.988288	0	0.938575	0.810745	0.812436	0.860702	0.880555	0.949111	0.928969	0.834481	0.855379	0.729958	0.88441	0.900683	0.837915	0.907638	0.853044	0.869195	0.815873	0.905293	0.806508	0.890927	0.896222	1.04868	0.913571	0.834624	0.925791	0.854327	0.780482	0.855467
coffee	0.899641	0.970799	0.850409	0.899844	0.903618	0.923828	0.936449	0.908495	0.865373	0.86988	0.632905	0.938575	0	0.905698	0.909582	0.643982	0.857406	0.857026	0.99472	0.886567	0.839362	0.924046	0.835733	0.729624	0.90298	0.754677	0.738678	0.929734	0.809585	0.869127	0.884231	0.920237	0.889139	0.87503	0.857867	0.795595	0.557825	0.87449	0.938428	0.985897
comb	0.862896	1.01235	0.807473	0.787381	0.84069	0.947544	0.789652	0.877655	0.836854	0.784535	0.851316	0.810745	0.905698	0	0.827066	0.943964	0.88312	0.834891	0.790643	0.862327	0.798563	0.895308	0.819942	0.801428	0.842637	0.860402	0.82109	0.817217	0.815495	1.03019	0.745298	0.74399	0.893368	1.06004	0.759864	0.758974	0.932651	0.907904	0.740024	0.892586
compass	0.78617	0.795861	0.766651	0.936801	0.983366	0.982432	0.847684	0.854064	0.868368	0.812214	0.928412	0.812436	0.909582	0.827066	0	0.894312	0.874871	0.799509	0.843214	0.82368	0.771902	0.774692	0.866979	0.831833	0.593637	0.820409	0.850555	0.721365	0.892552	0.953849	0.812092	0.832442	0.896583	0.853413	0.843129	0.752701	0.98109	0.997573	0.926654	0.851774
cup	0.87011	0.874389	0.896795	0.836124	0.597327	0.949049	0.891251	0.900131	0.915433	0.867639	0.827125	0.860702	0.643982	0.943964	0.894312	0	0.871654	0.745112	0.896987	0.918213	0.760859	0.794463	0.938016	0.769892	0.913856	0.701007	0.700017	0.837636	0.68342	0.742013	0.806945	0.888035	0.920859	1.02495	0.790239	0.527464	0.755715	0.972585	0.879352	0.882978
cymbal	0.698554	0.916976	0.786055	0.940235	0.88643	0.907928	0.846293	0.933524	0.881331	0.92434	0.835471	0.880555	0.857406	0.88312	0.874871	0.871654	0	0.592957	0.836112	0.848507	0.83913	0.502396	0.882035	0.932525	1.01748	0.841051	0.85628	0.847224	0.73506	0.819187	0.826718	0.912795	0.902587	0.851522	0.849057	0.734084	0.868986	1.02333	1.00858	0.867785
drumstick	0.746846	0.916376	0.752164	0.861825	0.761975	0.883962	0.733367	0.810364	0.744395	0.875407	0.809978	0.949111	0.857026	0.834891	0.799509	0.745112	0.592957	0	0.775456	0.797521	0.797305	0.705185	0.939328	0.77308	0.976784	0.626187	0.644896	0.827409	0.68141	0.783729	0.720779	0.738634	0.964815	0.847127	0.726117	0.521073	0.81723	1.05014	0.962817	0.853469
fangs	0.688956	0.935779	0.864687	0.905835	0.936824	0.846101	0.754911	0.820881	0.68299	0.96271	0.931526	0.928969	0.99472	0.790643	0.843214	0.896987	0.836112	0.775456	0	0.855804	0.837288	0.852727	0.824162	0.800386	0.932616	0.756322	0.851778	0.77705	0.778247	0.914397	0.80944	0.5808	0.935533	1.00574	0.785006	0.695145	0.969333	0.972857	0.86662	0.831018
gun	0.781387	0.842089	0.924876	0.822602	0.96104	0.948799	0.527194	0.864106	0.926648	0.971998	0.706836	0.834481	0.886567	0.862327	0.82368	0.918213	0.848507	0.797521	0.855804	0	0.838774	0.830092	0.895749	0.904409	0.830682	0.835136	0.826898	0.794946	0.772253	0.836945	0.714601	0.738864	0.899403	0.885956	0.892051	0.810663	0.947342	0.915269	0.934481	0.916556
hairdryer	0.955291	0.771465	0.769659	0.78984	0.919314	0.988222	0.854983	0.955846	0.90443	0.917099	0.806581	0.855379	0.839362	0.798563	0.771902	0.760859	0.83913	0.797305	0.837288	0.838774	0	0.806498	0.866185	0.883281	1.02817	0.811927	0.797634	0.810898	0.660152	0.899122	0.80244	0.868039	0.892863	0.834979	0.744216	0.69522	0.979934	0.869503	0.895435	0.833761
horn	0.731562	0.923933	0.776887	0.909521	0.918184	1.02126	0.839401	0.933356	0.847806	0.970407	0.925476	0.729958	0.924046	0.895308	0.774692	0.794463	0.502396	0.705185	0.852727	0.830092	0.806498	0	0.92862	0.904593	0.956384	0.827499	0.866249	0.792899	0.836977	0.779533	0.810434	0.840051	0.852974	0.833928	0.908493	0.793156	0.998753	1.0072	0.886273	0.84987
ink	0.942055	0.862927	0.708776	0.824818	0.898577	1.00584	0.879626	0.852427	0.956721	0.703866	0.839567	0.88441	0.835733	0.819942	0.866979	0.938016	0.882035	0.939328	0.824162	0.895749	0.866185	0.92862	0	0.710439	0.85837	0.911003	0.687845	0.520483	0.837494	0.921117	0.954033	0.912724	0.923127	1.03592	0.72041	0.852355	0.897646	0.883232	0.94915	0.871329
leaf	0.749879	0.960407	0.858029	0.81974	0.857023	0.817309	0.890694	0.672882	0.567402	0.752769	0.746014	0.900683	0.729624	0.801428	0.831833	0.769892	0.932525	0.77308	0.800386	0.904409	0.883281	0.904593	0.710439	0	0.812146	0.800306	0.778575	0.791063	0.793312	0.856493	0.758414	0.731	0.847855	0.948564	0.707627	0.70499	0.774875	0.96262	0.949382	0.908292
map	0.944681	0.968705	0.733476	0.860724	0.972572	0.948574	0.898635	0.895352	0.878534	0.702711	0.908378	0.837915	0.90298	0.842637	0.593637	0.913856	1.01748	0.976784	0.932616	0.830682	1.02817	0.956384	0.85837	0.812146	0	0.889526	0.744098	0.846468	0.962462	0.928625	0.883268	0.817354	0.886522	0.997839	0.887541	0.93977	0.939163	0.924573	0.855363	0.998053
marshmallow	0.775527	0.937291	0.782602	0.749389	0.717929	1.00758	0.825281	0.76685	0.622967	0.7893	0.792322	0.907638	0.754677	0.860402	0.820409	0.701007	0.841051	0.626187	0.756322	0.835136	0.811927	0.827499	0.911003	0.800306	0.889526	0	0.713911	0.878265	0.637516	0.879277	0.768821	0.708592	0.799376	1.04303	0.589125	0.524874	0.69415	1.00672	0.946628	0.933109
napkin	0.855533	0.914658	0.599776	0.669264	0.781228	0.99033	0.825222	0.8979	0.838945	0.729023	0.804538	0.853044	0.738678	0.82109	0.850555	0.700017	0.85628	0.644896	0.851778	0.826898	0.797634	0.866249	0.687845	0.778575	0.744098	0.713911	0	0.657495	0.567799	0.69772	0.802823	0.838367	0.963576	0.966927	0.685681	0.540741	0.884541	0.966143	0.94585	0.849565
pen	0.868015	0.841357	0.677487	0.824057	0.948142	0.977763	0.844943	0.847349	0.942499	0.754553	0.855048	0.869195	0.929734	0.817217	0.721365	0.837636	0.847224	0.827409	0.77705	0.794946	0.810898	0.792899	0.520483	0.791063	0.846468	0.878265	0.657495	0	0.745999	0.828591	0.818304	0.832078	1.03893	0.943172	0.822631	0.715614	0.999161	0.993485	0.919812	0.777444
pillow	0.800691	0.778775	0.777115	0.506005	0.84828	0.973283	0.801569	0.854748	0.821419	0.870451	0.78164	0.815873	0.809585	0.815495	0.892552	0.68342	0.73506	0.68141	0.778247	0.772253	0.660152	0.836977	0.837494	0.793312	0.962462	0.637516	0.567799	0.745999	0	0.829235	0.78097	0.767126	0.816793	0.925988	0.671287	0.58641	0.914433	0.871133	0.817099	0.826214
plate	0.8194	0.945937	0.792227	0.867019	0.757729	0.982515	0.833789	0.915674	0.871624	0.862694	0.928788	0.905293	0.869127	1.03019	0.953849	0.742013	0.819187	0.783729	0.914397	0.836945	0.899122	0.779533	0.921117	0.856493	0.928625	0.879277	0.69772	0.828591	0.829235	0	0.813412	0.867266	0.924254	0.886114	0.812096	0.673308	0.941746	0.993442	0.940641	0.846223
shovel	0.841251	0.877091	0.837637	0.753499	0.802922	0.984419	0.805198	0.92487	0.813783	0.806323	0.919772	0.806508	0.884231	0.745298	0.812092	0.806945	0.826718	0.720779	0.80944	0.714601	0.80244	0.810434	0.954033	0.758414	0.883268	0.768821	0.802823	0.818304	0.78097	0.813412	0	0.755701	0.644743	1.04122	0.780429	0.616523	0.956282	1.01165	0.89343	0.86715
snake	0.762239	0.933724	0.869244	0.803951	0.824876	0.915508	0.682187	0.646114	0.542123	0.880999	0.861547	0.890927	0.920237	0.74399	0.832442	0.888035	0.912795	0.738634	0.5808	0.738864	0.868039	0.840051	0.912724	0.731	0.817354	0.708592	0.838367	0.832078	0.767126	0.867266	0.755701	0	0.832536	0.892423	0.69078	0.700443	0.893501	0.95524	0.925791	0.807485
snow	0.753665	0.974133	0.893134	0.711938	0.882684	0.960738	0.973291	1.0038	0.790047	0.845187	0.924751	0.896222	0.889139	0.893368	0.896583	0.920859	0.902587	0.964815	0.935533	0.899403	0.892863	0.852974	0.923127	0.847855	0.886522	0.799376	0.963576	1.03893	0.816793	0.924254	0.644743	0.832536	0	1.02904	0.915871	0.866656	0.869945	0.944392	0.90415	0.976494
speaker	0.972662	0.893684	0.846166	1.07009	1.00686	0.900028	0.912063	0.955922	0.982464	1.03738	0.88451	1.04868	0.87503	1.06004	0.853413	1.02495	0.851522	0.847127	1.00574	0.885956	0.834979	0.833928	1.03592	0.948564	0.997839	1.04303	0.966927	0.943172	0.925988	0.886114	1.04122	0.892423	1.02904	0	0.986561	0.991484	1.01962	0.820717	0.98897	0.938232
sponge	0.855971	0.875131	0.810833	0.785413	0.766856	0.92819	0.902155	0.782596	0.694589	0.795204	0.919715	0.913571	0.857867	0.759864	0.843129	0.790239	0.849057	0.726117	0.785006	0.892051	0.744216	0.908493	0.72041	0.707627	0.887541	0.589125	0.685681	0.822631	0.671287	0.812096	0.780429	0.69078	0.915871	0.986561	0	0.573742	0.743659	0.981891	0.924732	0.929329
spoon	0.78602	0.876792	0.755155	0.790206	0.626768	1.03053	0.827227	0.833033	0.729021	0.789339	0.847182	0.834624	0.795595	0.758974	0.752701	0.527464	0.734084	0.521073	0.695145	0.810663	0.69522	0.793156	0.852355	0.70499	0.93977	0.524874	0.540741	0.715614	0.58641	0.673308	0.616523	0.700443	0.866656	0.991484	0.573742	0	0.778214	1.00055	0.870273	0.738372
sugar	0.920355	0.889621	0.90918	0.947396	0.805829	1.00466	0.995294	0.984983	0.873057	0.853474	0.727086	0.925791	0.557825	0.932651	0.98109	0.755715	0.868986	0.81723	0.969333	0.947342	0.979934	0.998753	0.897646	0.774875	0.939163	0.69415	0.884541	0.999161	0.914433	0.941746	0.956282	0.893501	0.869945	1.01962	0.743659	0.778214	0	0.91388	1.00132	1.00089
television	1.01191	0.916833	0.824108	0.893536	0.90562	0.98255	0.97416	0.99506	0.985172	0.9825	0.789902	0.854327	0.87449	0.907904	0.997573	0.972585	1.02333	1.05014	0.972857	0.915269	0.869503	1.0072	0.883232	0.96262	0.924573	1.00672	0.966143	0.993485	0.871133	0.993442	1.01165	0.95524	0.944392	0.820717	0.981891	1.00055	0.91388	0	0.667102	0.850724
watch	1.01822	0.923182	0.870904	0.875279	0.872861	0.969458	0.970545	0.926083	0.939863	0.917252	0.973087	0.780482	0.938428	0.740024	0.926654	0.879352	1.00858	0.962817	0.86662	0.934481	0.895435	0.886273	0.94915	0.949382	0.855363	0.946628	0.94585	0.919812	0.817099	0.940641	0.89343	0.925791	0.90415	0.98897	0.924732	0.870273	1.00132	0.667102	0	0.845597
wire	0.842787	0.862356	0.91184	0.787148	0.90895	0.898024	0.842001	0.905672	0.930091	0.937694	0.944322	0.855467	0.985897	0.892586	0.851774	0.882978	0.867785	0.853469	0.831018	0.916556	0.833761	0.84987	0.871329	0.908292	0.998053	0.933109	0.849565	0.777444	0.826214	0.846223	0.86715	0.807485	0.976494	0.938232	0.929329	0.738372	1.00089	0.850724	0.845597	0
